# Supplementary material for: In Vivo Electroporation-Mediated, Intrahepatic Alpha1 Antitrypsin Gene Transfer Reduces Pulmonary Emphysema in Pallid Mice
Source: PubMed Central journal article supplement (PMC7559762; doi:10.3390/pharmaceutics12090793), 2020-08-21
Supplement: pharmaceutics-12-00793-s001.pdf [file pharmaceutics-12-00793-s001.pdf]

# In Vivo Electroporation-Mediated, Intrahepatic Alpha1 Antitrypsin Gene Transfer Reduces Pulmonary Emphysema in Pallid Mice

Marco A. Sutter, Tiziana P. Cremona, Izabela Nita, Eleonora Cavarra, Giuseppe Lungarella, Eli C. Lewis, Johannes C. Schittny, Thomas Geiser and Amiq Gazdhar

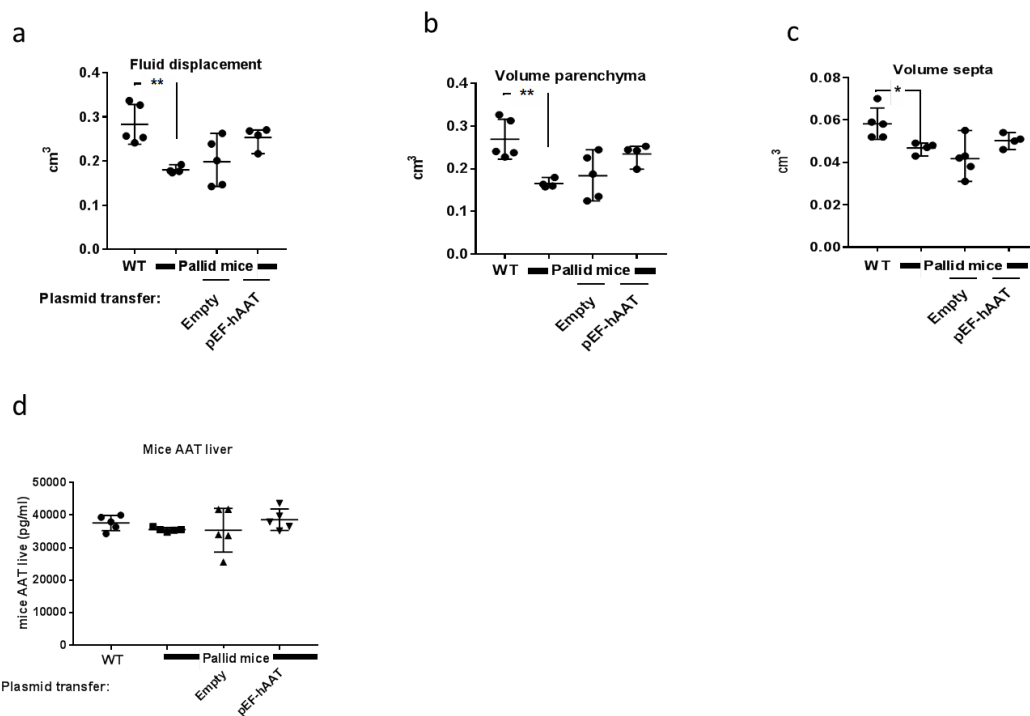

**Figure S1.** Lung morphometry: Stereological analysis of (a) fluid displacement, (b) total volume parenchyma, (c) total septal volume and (d) serum level of mice AAT. \*  $p < 0.05$ , \*\*  $p < 0.01$ .

**Table S1.** Stereology additional data.

| Parameters                            | WT (wildtype) | Pallid mice  | Empty vector | hAAT plasmid |
|---------------------------------------|---------------|--------------|--------------|--------------|
| Fluid displacement (cm <sup>3</sup> ) | 0.28 ± 0.02   | 0.18 ± 0.004 | 0.19 ± 0.02  | 0.25 ± 0.01  |
| Volume Parenchyma (cm <sup>3</sup> )  | 0.26 ± 0.02   | 0.16 ± 0.004 | 0.18 ± 0.02  | 0.23 ± 0.01  |
| Volume Septa (cm <sup>3</sup> )       | 0.05 ± 0.003  | 0.04 ± 0.001 | 0.04 ± 0.003 | 0.05 ± 0.001 |
